# Supplementary material for: Overexpression of HPRT1 is associated with poor prognosis in head and neck squamous cell carcinoma
Source: bioRxiv or medRxiv preprint supplement (doi:10.1101/2020.12.10.20246991), 2020-12-11
Supplement: Supplementary file [file media-1.pdf]

## **Database characteristics:**

The Gene Expression Omnibus (GEO) database (<https://www.ncbi.nlm.nih.gov/geo/>) is a useful resource of available gene expression data that can be combined and investigated to derive new theories and knowledge [1].

University of California Santa Cruz (UCSC) Xena browser (<https://xenabrowser.net/>) is a useful resource for analyzing and visualization of multi-omic data and associated clinical and phenotypic annotations [2].

The Human Protein Atlas (HPA) (<https://www.proteinatlas.org/pathology>) is the largest and most comprehensive database for proteins in tissues and cells, providing an invaluable data for exploration of expression profile at a single-cell resolution [3].

The Catalogue of Somatic Mutations in Cancer (COSMIC) database (<http://cancer.sanger.ac.uk>), is a high-resolution web tool for exploring the impact of somatic mutations in all kind of human cancers [4].

The cBio Cancer Genomics Portal (<http://cbioportal.org>), is an open-access resource for cancer genomic datasets [5].

The Kaplan–Meier plotter (<http://kmplot.com/analysis>), is an online platform that can be utilized to assess the influence of 54,675 genes on survival outcomes of patients in 21 cancer types [6, 7].

Enrichr (<http://amp.pharm.mssm.edu/Enrichr>) database is a comprehensive platform for curated gene sets and a search engine that provides biological knowledge for further biological hypothesis [8].

**Tables:**

**Table S1.** Clinicopathological feature of patients in the TCGA-HNSCC cohort.

| Clinicopathological parameter | Category      | N   | Percent |
|-------------------------------|---------------|-----|---------|
| Tissue specimens              | HNSCC         | 520 | 92      |
|                               | Non-cancerous | 44  | 8       |
| Age                           | 20-40         | 24  | 4       |
|                               | 41-60         | 249 | 44      |
|                               | 61-80         | 262 | 47      |
|                               | 81-100        | 27  | 5       |
| Sex                           | Female        | 150 | 27      |
|                               | Male          | 414 | 73      |
| Stage                         | I             | 27  | 5       |
|                               | II            | 74  | 14      |
|                               | III           | 81  | 16      |
|                               | IV            | 266 | 51      |
|                               | NA            | 71  | 14      |
| Grade                         | G1            | 62  | 12      |
|                               | G2            | 304 | 59      |
|                               | G3            | 125 | 24      |
|                               | G4            | 7   | 1       |
|                               | NA            | 18  | 4       |

TCGA: The Cancer Genome Atlas, HNSCC: Head and Neck Squamous Cell Carcinoma, NA: Not Available, N: Sample count.

**Table S2.** Clinicopathological feature of patients in the validation cohort.

| Clinicopathological parameter | Category      | M  | Percent |
|-------------------------------|---------------|----|---------|
| Tissue specimens              | HNSCC         | 45 | 50      |
|                               | Non-cancerous | 45 | 50      |
| Age                           | <60           | 30 | 68      |
|                               | ≥60           | 15 | 32      |
| Sex                           | Female        | 33 | 73      |
|                               | Male          | 12 | 27      |
| Stage                         | I-II          | 18 | 40      |
|                               | III-IV        | 27 | 40      |
| Grade                         | G1            | 9  | 20      |
|                               | G2            | 15 | 33      |
|                               | G3            | 21 | 47      |

TCGA: The Cancer Genome Atlas, HNSCC: Head and Neck Squamous Cell Carcinoma, NA: Not Available, N: Sample count.

**Table S3.** Primer sequences used in this study.

| qRT-PCR primers | Type of primers | Sequences |
|-----------------|-----------------|-----------|
|-----------------|-----------------|-----------|

|                       |                |                              |
|-----------------------|----------------|------------------------------|
| HPRT1 (target gene)   | Forward primer | 5'-TGGCGTCGTGATTAGTGATG-3'   |
| HPRT1 (target gene)   | Reverse primer | 5'-ACAGAGGGCTACAATGTGATG-3'  |
| SDHA (reference gene) | Forward primer | 5'-CTTGCCAGGACCTAGAGTTTGT-3' |
| SDHA (reference gene) | Reverse primer | 5'-CTCTCCACGACATCCTCCG-3'    |

**Table S4.** The association between *HPRT1* mRNA expression and clinicopathological features of HNSCC patients in TCGA cohort.

| Comparison                           | N   |     | Mean Difference | P-values | Significant |
|--------------------------------------|-----|-----|-----------------|----------|-------------|
|                                      | A1  | A2  |                 |          |             |
| HNSCC vs. Normal                     | 520 | 44  | 0.8821          | <0.0001  | yes         |
| Male vs. Normal                      | 384 | 45  | 0.9098          | <0.0001  | yes         |
| Female vs. Normal                    | 136 | 45  | 0.8821          | <0.0001  | yes         |
| Female vs. Male                      | 136 | 384 | -0.02764        | 0.8695   | ns          |
| Age (20-40 yrs) vs. Normal           | 20  | 44  | 0.7990          | <0.0001  | yes         |
| Age (41-60 yrs) vs. Normal           | 236 | 44  | 0.8870          | <0.0001  | yes         |
| Age (61-80 yrs) vs. Normal           | 238 | 44  | 0.9028          | <0.0001  | yes         |
| Age (81-100 yrs) vs. Normal          | 24  | 44  | 0.7683          | <0.0001  | yes         |
| Age (41-60 yrs) vs. Age (20-40 yrs)  | 236 | 20  | 0.08800         | 0.9630   | ns          |
| Age (61-80 yrs) vs. Age (20-40 yrs)  | 238 | 20  | 0.1038          | 0.9338   | ns          |
| Age (81-100 yrs) vs. Age (20-40 yrs) | 24  | 20  | -0.03076        | 0.9998   | ns          |
| Age (61-80 yrs) vs. Age (41-60 yrs)  | 238 | 236 | 0.01576         | 0.9981   | ns          |
| Age (81-100 yrs) vs. Age (41-60 yrs) | 24  | 236 | -0.1188         | 0.8637   | ns          |
| Age (81-100 yrs) vs. Age (61-80 yrs) | 24  | 238 | -0.1345         | 0.8003   | ns          |
| Stage I vs. Normal                   | 27  | 44  | 0.6792          | <0.0001  | yes         |
| Stage II vs. Normal                  | 74  | 44  | 0.8926          | <0.0001  | yes         |
| Stage III vs. Normal                 | 81  | 44  | 0.9906          | <0.0001  | yes         |
| Stage IV vs. Normal                  | 266 | 44  | 0.9025          | <0.0001  | yes         |
| Stage II vs. Stage I                 | 74  | 27  | 0.2134          | 0.4358   | ns          |
| Stage III vs. Stage I                | 81  | 27  | 0.3114          | 0.0907   | ns          |
| Stage IV vs. Stage I                 | 266 | 27  | 0.2233          | 0.2782   | ns          |
| Stage III vs. Stage II               | 81  | 74  | 0.09797         | 0.8117   | ns          |
| Stage IV vs. Stage II                | 266 | 74  | 0.009883        | >0.9999  | ns          |
| Stage IV vs. Stage III               | 266 | 81  | -0.08808        | 0.7268   | ns          |
| Grade I vs. Normal                   | 62  | 44  | 0.7456          | <0.0001  | yes         |
| Grade II vs. Normal                  | 304 | 44  | 0.8725          | <0.0001  | yes         |
| Grade III vs. Normal                 | 125 | 44  | 0.9546          | <0.0001  | yes         |
| Grade IV vs. Normal                  | 7   | 44  | 0.8923          | 0.0010   | yes         |
| Grade II vs. Grade I                 | 304 | 62  | 0.1269          | 0.4845   | ns          |
| Grade III vs. Grade I                | 125 | 62  | 0.2090          | 0.1181   | ns          |
| Grade IV vs. Grade I                 | 21  | 62  | 0.1467          | 0.9656   | ns          |
| Grade III vs. Grade II               | 125 | 304 | 0.08211         | 0.6434   | ns          |
| Grade IV vs. Grade II                | 7   | 304 | 0.01985         | >0.9999  | ns          |
| Grade IV vs. Grade III               | 7   | 125 | -0.06226        | 0.9985   | ns          |

TCGA: The Cancer Genome Atlas, HNSCC: Head and Neck Squamous Cell Carcinoma, N: Sample count, A1: Attribute 1, A2: Attribute 2, ns: not significant.

**Table S5.** The association between *HPRT1* mRNA expression and clinicopathological features of HNSCC patients in our validation cohort.

| Comparison                      | N  |    | Mean Difference | P-values | Significant |
|---------------------------------|----|----|-----------------|----------|-------------|
|                                 | A1 | A2 |                 |          |             |
| HNSCC vs. Normal                | 45 | 45 | 2.758           | <0.0001  | yes         |
| Male vs. Normal                 | 33 | 45 | 2.961           | <0.0001  | yes         |
| Female vs. Normal               | 12 | 45 | 2.201           | 0.0096   | yes         |
| Female vs. Male                 | 12 | 33 | -0.7597         | 0.5789   | ns          |
| Age (>60 yrs) vs. Normal        | 30 | 45 | 3.053           | <0.0001  | yes         |
| Age (<60 yrs) vs. Normal        | 15 | 45 | 2.169           | 0.0048   | yes         |
| Age (<60 yrs) vs. Age (>60 yrs) | 15 | 30 | -0.8834         | 0.4312   | ns          |
| Stage II vs. Normal             | 18 | 45 | 2.857           | <0.0001  | yes         |
| Stage III vs. Normal            | 27 | 45 | 2.693           | <0.0001  | yes         |
| Stage III vs. Stage II          | 27 | 18 | -0.1643         | 0.9692   | ns          |
| Grade I vs. Normal              | 9  | 45 | 3.259           | 0.001    | yes         |
| Grade II vs. Normal             | 15 | 45 | 2.425           | 0.0031   | yes         |
| Grade III vs. Normal            | 21 | 45 | 2.782           | <0.0001  | yes         |
| Grade II vs. Grade I            | 15 | 9  | -0.8336         | 0.8198   | ns          |
| Grade III vs. Grade I           | 21 | 9  | -0.4774         | 0.9521   | ns          |
| Grade III vs. Grade II          | 21 | 15 | 0.3562          | 0.9666   | ns          |

HNSCC: Head and Neck Squamous Cell Carcinoma, N: Sample count, A1: Attribute 1, A2: Attribute 2, ns: not significant.

**Table S6.** The co-expressed genes of *HPRT1* in HNSCC, collected from the UALCAN database.

| Genes   | Pearson CC |
|---------|------------|
| VBP1    | 0.66       |
| PGRMC1  | 0.63       |
| RBMX2   | 0.62       |
| DKC1    | 0.62       |
| PSMD10  | 0.59       |
| VMA21   | 0.59       |
| NKRF    | 0.59       |
| PRPS1   | 0.57       |
| CHAC2   | 0.56       |
| ZNF280C | 0.56       |
| UTP14A  | 0.56       |
| FAM122B | 0.56       |
| ALG13   | 0.56       |
| GLA     | 0.55       |
| SLC25A5 | 0.55       |
| NKAP    | 0.55       |
| AIFM1   | 0.54       |
| VRK1    | 0.54       |
| PTGES3  | 0.54       |
| NONO    | 0.53       |

|          |      |
|----------|------|
| XPO1     | 0.53 |
| PHF5A    | 0.53 |
| TIMM8A   | 0.53 |
| CCDC59   | 0.53 |
| DSCC1    | 0.52 |
| HTATSF1  | 0.52 |
| CHRNA5   | 0.52 |
| SLC25A17 | 0.52 |
| MORF4L2  | 0.52 |
| TCEAL4   | 0.52 |
| MST4     | 0.52 |
| KIF4A    | 0.51 |
| CDKN3    | 0.51 |
| C15orf23 | 0.51 |
| ORC6L    | 0.51 |
| UPF3B    | 0.51 |
| MMGT1    | 0.51 |
| HNRNPC   | 0.51 |
| EMD      | 0.51 |
| SFRS7    | 0.51 |
| RBMX     | 0.51 |
| GPN3     | 0.51 |
| FAM127B  | 0.51 |
| GLRX5    | 0.5  |
| UBE2A    | 0.5  |
| XRCC6    | 0.5  |
| SSB      | 0.5  |
| OCRL     | 0.5  |
| MAP7D3   | 0.5  |
| MRPL30   | 0.5  |
| PHF6     | 0.5  |
| ADSL     | 0.5  |
| CXorf56  | 0.49 |
| CENPI    | 0.49 |
| EPR1     | 0.49 |
| SLC25A14 | 0.49 |
| MTA1     | 0.49 |
| RAD54B   | 0.49 |
| CEBPZ    | 0.49 |
| KLHL13   | 0.48 |
| CCNB2    | 0.48 |
| WDR67    | 0.48 |
| DPY30    | 0.48 |
| ERH      | 0.48 |
| MNAT1    | 0.48 |
| BUB1     | 0.48 |

|           |      |
|-----------|------|
| ERCC6L    | 0.48 |
| NUP37     | 0.48 |
| UBE2T     | 0.48 |
| SFRS9     | 0.48 |
| MTHFD2    | 0.48 |
| MAD2L1    | 0.48 |
| RAD51L3   | 0.48 |
| ST13      | 0.48 |
| MCTS1     | 0.48 |
| HSPD1     | 0.48 |
| CBX3      | 0.48 |
| BOLA3     | 0.48 |
| MTCP1NB   | 0.48 |
| DHX9      | 0.48 |
| PGK1      | 0.48 |
| SFRS3     | 0.48 |
| MAPKAPK5  | 0.48 |
| LAS1L     | 0.48 |
| C14orf143 | 0.47 |
| NUF2      | 0.47 |
| CNIH4     | 0.47 |
| ILF2      | 0.47 |
| SPC25     | 0.47 |
| CCT4      | 0.47 |
| PAICS     | 0.47 |
| CDK1      | 0.47 |
| C12orf48  | 0.47 |
| UBA2      | 0.47 |
| PNO1      | 0.47 |
| ARMCX5    | 0.47 |
| FANCB     | 0.47 |
| SIP1      | 0.47 |
| DLGAP5    | 0.47 |
| ACTL6A    | 0.47 |
| THOC2     | 0.47 |
| STAG2     | 0.46 |
| C1GALT1C1 | 0.46 |
| CALM2     | 0.46 |
| TMEM97    | 0.46 |
| FAM72A    | 0.46 |
| KIF23     | 0.46 |
| ZC3H8     | 0.46 |
| PPAT      | 0.46 |
| CACYBP    | 0.46 |
| ENOX2     | 0.46 |
| UTP18     | 0.46 |

|           |      |
|-----------|------|
| CETN2     | 0.46 |
| FAM10A4   | 0.46 |
| EXO1      | 0.46 |
| ATPBD4    | 0.46 |
| CENPA     | 0.46 |
| HNRNPA3P1 | 0.46 |
| HSP90AA1  | 0.46 |
| ABCB7     | 0.46 |
| ATP11C    | 0.46 |
| PPM1G     | 0.46 |
| KIF18A    | 0.46 |
| BUB1B     | 0.46 |
| C16orf61  | 0.46 |
| TDP1      | 0.45 |
| POLR2D    | 0.45 |
| CNIH      | 0.45 |
| LOC728024 | 0.45 |
| TRMT61B   | 0.45 |
| KIF4B     | 0.45 |
| HAT1      | 0.45 |
| MRPL42    | 0.45 |
| C17orf75  | 0.45 |
| TROAP     | 0.45 |
| RAN       | 0.45 |
| NCAPH     | 0.45 |
| CENPN     | 0.45 |
| HNRNPA2B1 | 0.45 |
| TCEA1     | 0.45 |
| DAP3      | 0.45 |
| CSTF2     | 0.45 |
| CECR5     | 0.45 |
| ZCRB1     | 0.45 |
| DDX24     | 0.45 |
| C2orf3    | 0.45 |
| TPRKB     | 0.45 |
| ZWILCH    | 0.45 |
| CDC45     | 0.44 |
| FAM58A    | 0.44 |
| SUV39H2   | 0.44 |
| FAM54A    | 0.44 |
| PSMA3     | 0.44 |
| GABPB1    | 0.44 |
| TAF1A     | 0.44 |
| BCCIP     | 0.44 |
| NHP2L1    | 0.44 |
| APEX1     | 0.44 |

|            |      |
|------------|------|
| FAM72B     | 0.44 |
| UBE2N      | 0.44 |
| FAM96A     | 0.44 |
| ACP1       | 0.44 |
| HIBADH     | 0.44 |
| G2E3       | 0.44 |
| CDK4       | 0.44 |
| GTSE1      | 0.44 |
| RRP15      | 0.44 |
| TSEN15     | 0.44 |
| UBL4A      | 0.44 |
| WDHD1      | 0.44 |
| NCRNA00183 | 0.44 |
| HNRNPH2    | 0.44 |
| MCM10      | 0.44 |
| IMMT       | 0.44 |
| C1orf131   | 0.44 |
| ECT2       | 0.44 |
| TFAM       | 0.44 |
| DDX50      | 0.43 |
| PPHLN1     | 0.43 |
| MRPL35     | 0.43 |
| KPNA2      | 0.43 |
| PPIL5      | 0.43 |
| CHD1L      | 0.43 |
| SFXN1      | 0.43 |
| PCBP2      | 0.43 |
| RNASEH1    | 0.43 |
| NUP62CL    | 0.43 |
| YY1        | 0.43 |
| XRCC3      | 0.43 |
| SPATS2     | 0.43 |
| DDX55      | 0.43 |
| TTK        | 0.43 |
| KIF14      | 0.43 |
| SNW1       | 0.43 |
| CXorf40B   | 0.43 |
| PYCR2      | 0.43 |
| TMLHE      | 0.43 |
| DBF4       | 0.43 |
| C12orf24   | 0.43 |
| PARP2      | 0.43 |
| AHSA1      | 0.43 |
| C2orf56    | 0.43 |
| ACTR6      | 0.43 |
| SRP9       | 0.43 |



|           |      |
|-----------|------|
| FOX M1    | 0.43 |
| NEK2      | 0.43 |
| MECP2     | 0.43 |
| RPAP3     | 0.43 |
| PRDX3     | 0.43 |
| MRPS23    | 0.43 |
| DARS      | 0.43 |
| HMGB3     | 0.43 |
| PBK       | 0.43 |
| PDCD10    | 0.43 |
| HNRNPA3   | 0.43 |
| PWP1      | 0.43 |
| USP39     | 0.43 |
| RFC5      | 0.43 |
| PTPLAD1   | 0.43 |
| TATDN1    | 0.43 |
| HNRNPL    | 0.43 |
| AURKA     | 0.43 |
| HNRPLL    | 0.43 |
| RAP2C     | 0.43 |
| PPP1CC    | 0.43 |
| MED30     | 0.43 |
| CUL4B     | 0.42 |
| TOMM22    | 0.42 |
| ZC3H14    | 0.42 |
| CDCA7     | 0.42 |
| PDZD11    | 0.42 |
| UCK2      | 0.42 |
| SMNDC1    | 0.42 |
| WDR43     | 0.42 |
| MKI67IP   | 0.42 |
| SUPT16H   | 0.42 |
| FMR1      | 0.42 |
| C14orf104 | 0.42 |
| CHEK2     | 0.42 |
| POLG2     | 0.42 |
| MRPL3     | 0.42 |
| PRKRA     | 0.42 |
| LRR37B2   | 0.42 |
| ARL6IP6   | 0.42 |
| MTERFD1   | 0.42 |
| NAP1L1    | 0.42 |
| CEP55     | 0.42 |
| HAX1      | 0.42 |
| ARHGAP11A | 0.42 |
| RFC2      | 0.42 |

|          |      |
|----------|------|
| THUMPD2  | 0.42 |
| HAUS2    | 0.42 |
| HNRNPK   | 0.42 |
| CCNA2    | 0.42 |
| RNF113A  | 0.42 |
| COX7A2L  | 0.42 |
| XRCC6BP1 | 0.42 |
| PRIM2    | 0.42 |
| PPP3R1   | 0.42 |
| HSPE1    | 0.42 |
| NLE1     | 0.42 |
| BLM      | 0.42 |
| DENR     | 0.42 |
| RAD51    | 0.42 |
| FAM72D   | 0.42 |
| NFYB     | 0.42 |
| HNRNPU   | 0.42 |
| DEPDC1B  | 0.42 |
| NEIL3    | 0.42 |
| AGK      | 0.42 |
| OSGIN2   | 0.42 |
| DBF4B    | 0.42 |
| PNN      | 0.42 |
| PAPOLA   | 0.42 |
| ANP32E   | 0.42 |
| MSH6     | 0.42 |
| BOD1     | 0.42 |
| SNRPG    | 0.42 |
| GGCT     | 0.42 |
| R3HDM1   | 0.42 |
| TUBA1B   | 0.42 |
| IARS2    | 0.42 |
| GMPS     | 0.42 |
| CENPL    | 0.41 |
| GNG10    | 0.41 |
| CSE1L    | 0.41 |
| SFRS2    | 0.41 |
| NCBP2    | 0.41 |
| CCT6P1   | 0.41 |
| TMX1     | 0.41 |
| AMZ2     | 0.41 |
| HNRNPR   | 0.41 |
| HMG4     | 0.41 |
| SEC11A   | 0.41 |
| C16orf80 | 0.41 |
| NOP58    | 0.41 |

|           |      |
|-----------|------|
| TRMT2B    | 0.41 |
| SNAPC5    | 0.41 |
| RAE1      | 0.41 |
| MAGT1     | 0.41 |
| LRPPRC    | 0.41 |
| CHCHD3    | 0.41 |
| SUMO2     | 0.41 |
| LOC649330 | 0.41 |
| CRIP1     | 0.41 |
| IKBK1     | 0.41 |
| METTL2A   | 0.41 |
| MTIF2     | 0.41 |
| KIAA1467  | 0.41 |
| HJURP     | 0.41 |
| PNPT1     | 0.41 |
| FANCM     | 0.41 |
| DEPDC4    | 0.41 |
| C14orf109 | 0.41 |
| KIF18B    | 0.41 |
| TRA2B     | 0.41 |
| AURKAP1   | 0.41 |
| TIPIN     | 0.41 |
| DLEU2     | 0.41 |
| MRPL9     | 0.41 |
| C12orf32  | 0.41 |
| CDCA5     | 0.41 |
| SF3B14    | 0.41 |
| TOMM20    | 0.41 |
| MRPS35    | 0.41 |
| C14orf169 | 0.41 |
| MORC4     | 0.41 |
| UBR7      | 0.41 |
| SET       | 0.41 |
| ANP32A    | 0.41 |
| SPAG5     | 0.41 |
| DARS2     | 0.41 |
| HOXA10    | 0.41 |
| TRIP13    | 0.41 |
| MGAT2     | 0.41 |
| SLC9A6    | 0.41 |
| TOP2A     | 0.41 |
| FANCI     | 0.41 |
| RLIM      | 0.41 |
| OLA1      | 0.41 |
| TCEAL1    | 0.41 |
| RHEB      | 0.41 |

|           |      |
|-----------|------|
| CDC6      | 0.41 |
| WDR12     | 0.41 |
| NOL11     | 0.41 |
| NUCKS1    | 0.41 |
| NAE1      | 0.41 |
| UTP6      | 0.41 |
| KIAA0101  | 0.41 |
| PSMD14    | 0.41 |
| MTHFS     | 0.41 |
| UIMC1     | 0.4  |
| FAM199X   | 0.4  |
| C12orf11  | 0.4  |
| LOC493754 | 0.4  |
| CCT3      | 0.4  |
| ASF1A     | 0.4  |
| SUMO1P3   | 0.4  |
| GDI1      | 0.4  |
| RFC4      | 0.4  |
| C17orf42  | 0.4  |
| KRR1      | 0.4  |
| ANP32B    | 0.4  |
| RACGAP1   | 0.4  |
| LSM12     | 0.4  |
| IGBP1     | 0.4  |
| RSL24D1   | 0.4  |
| CCDC138   | 0.4  |
| PARP1     | 0.4  |
| CDCA3     | 0.4  |
| PTCD3     | 0.4  |
| TIAL1     | 0.4  |
| PRC1      | 0.4  |
| UTP23     | 0.4  |
| LOC723972 | 0.4  |
| C1orf27   | 0.4  |
| SSRP1     | 0.4  |
| BRCC3     | 0.4  |
| CRCP      | 0.4  |
| DNA2      | 0.4  |
| PTDSS1    | 0.4  |
| ZNF26     | 0.4  |
| MTFMT     | 0.4  |
| ZDHHC9    | 0.4  |
| TBPL1     | 0.4  |
| CCDC41    | 0.4  |
| CDCA4     | 0.4  |
| CKS2      | 0.4  |

|           |      |
|-----------|------|
| XRCC2     | 0.4  |
| CDC123    | 0.4  |
| E2F6      | 0.4  |
| DPY19L4   | 0.4  |
| NUDCD1    | 0.4  |
| COPS3     | 0.4  |
| BZW2      | 0.4  |
| NOL10     | 0.4  |
| COQ3      | 0.4  |
| ASPM      | 0.4  |
| ZBTB33    | 0.4  |
| ARL6IP1   | 0.4  |
| NF1       | 0.4  |
| SLC35B1   | 0.4  |
| C1orf135  | 0.4  |
| DEPDC1    | 0.4  |
| DIABLO    | 0.4  |
| METAP2    | 0.4  |
| YDJC      | 0.4  |
| H2AFZ     | 0.4  |
| COX4NB    | 0.4  |
| KPNB1     | 0.4  |
| OTUD6B    | 0.4  |
| FAM189B   | 0.4  |
| TIMM17A   | 0.4  |
| C10orf119 | 0.4  |
| VKORC1L1  | 0.4  |
| C3orf26   | 0.4  |
| RAD51AP1  | 0.4  |
| HNRNPA1L2 | 0.4  |
| FLVCR1    | 0.4  |
| PLK1      | 0.4  |
| SMC4      | 0.4  |
| CDCA7L    | 0.4  |
| MTBP      | 0.4  |
| IAH1      | 0.4  |
| BRIX1     | 0.39 |
| EPT1      | 0.39 |
| F8A1      | 0.39 |
| C1QBP     | 0.39 |
| SEPHS1    | 0.39 |
| TBCCD1    | 0.39 |
| CCNB1IP1  | 0.39 |
| RBBP7     | 0.39 |
| TXNRD1    | 0.39 |
| BRMS1L    | 0.39 |

|          |      |
|----------|------|
| KIAA1586 | 0.39 |
| TERF1    | 0.39 |
| VAMP7    | 0.39 |
| SFPQ     | 0.39 |
| NUP93    | 0.39 |
| CCDC104  | 0.39 |
| HDGFRP3  | 0.39 |
| WBSCR22  | 0.39 |
| MTHFD1   | 0.39 |
| NGFRAP1  | 0.39 |
| TBCE     | 0.39 |
| LAMP2    | 0.39 |
| NUP205   | 0.39 |
| RBM28    | 0.39 |
| MATR3    | 0.39 |
| SNUPN    | 0.39 |
| AIMP1    | 0.39 |
| DNAJC2   | 0.39 |
| HDAC2    | 0.39 |
| MSH2     | 0.39 |
| DTL      | 0.39 |
| COX11    | 0.39 |
| GMNN     | 0.39 |
| KLHL7    | 0.39 |
| C16orf63 | 0.39 |
| ZFAND1   | 0.39 |
| FKBP3    | 0.39 |
| CIRH1A   | 0.39 |
| HMGB1    | 0.39 |
| WDR75    | 0.39 |
| SFRS13A  | 0.39 |
| DRG1     | 0.39 |
| NLN      | 0.39 |
| HELLS    | 0.39 |
| KHDRBS1  | 0.39 |
| ATAD5    | 0.39 |
| CDCA8    | 0.39 |
| H2AFV    | 0.39 |
| PRPSAP2  | 0.39 |
| C11orf84 | 0.39 |
| GINS2    | 0.39 |
| ASB3     | 0.39 |
| HAUS8    | 0.39 |
| TFB2M    | 0.39 |
| ZNF449   | 0.39 |
| KIF15    | 0.39 |

|          |      |
|----------|------|
| IRAK1    | 0.39 |
| DDX18    | 0.39 |
| NUP133   | 0.39 |
| PRELID2  | 0.39 |
| DCAF13   | 0.39 |
| LIN9     | 0.39 |
| STAMBP   | 0.39 |
| TMEM206  | 0.39 |
| TMEM60   | 0.39 |
| MRPL19   | 0.39 |
| C3orf33  | 0.39 |
| NOB1     | 0.39 |
| FAM64A   | 0.39 |
| SFRS1    | 0.39 |
| TSPAN13  | 0.39 |
| EXOSC2   | 0.39 |
| NGDN     | 0.39 |
| AURKB    | 0.39 |
| CBX1     | 0.39 |
| BUB3     | 0.39 |
| HSPA14   | 0.39 |
| RNASEH2B | 0.39 |
| WDYHV1   | 0.39 |
| RSL1D1   | 0.39 |
| CENPO    | 0.39 |
| SPG21    | 0.39 |
| ORC2L    | 0.39 |
| RBM17    | 0.39 |
| TOR3A    | 0.39 |
| PSMD11   | 0.39 |
| TSN      | 0.39 |
| MAP4K3   | 0.39 |
| C15orf44 | 0.39 |
| TAZ      | 0.39 |
| CDK2     | 0.39 |
| ADSS     | 0.39 |
| USP10    | 0.39 |
| PUS1     | 0.39 |
| FEN1     | 0.39 |
| C1orf31  | 0.39 |
| GSG2     | 0.39 |
| CPSF6    | 0.39 |
| SUPV3L1  | 0.39 |
| PCGF6    | 0.39 |
| TMEM164  | 0.39 |
| POLR2H   | 0.39 |

|           |      |
|-----------|------|
| IPO9      | 0.38 |
| PRMT5     | 0.38 |
| RFT1      | 0.38 |
| SLC6A8    | 0.38 |
| MPHOSPH9  | 0.38 |
| MTCP1     | 0.38 |
| RCN2      | 0.38 |
| STARD7    | 0.38 |
| LBR       | 0.38 |
| FXR1      | 0.38 |
| ZMYM3     | 0.38 |
| LSM5      | 0.38 |
| SLC4A1AP  | 0.38 |
| BAG2      | 0.38 |
| RSRC2     | 0.38 |
| ATP2B1    | 0.38 |
| WASF1     | 0.38 |
| G3BP1     | 0.38 |
| TXNDC12   | 0.38 |
| HNRNPD    | 0.38 |
| RBM34     | 0.38 |
| NUPL2     | 0.38 |
| HDAC8     | 0.38 |
| TMEM14B   | 0.38 |
| TATDN3    | 0.38 |
| NOM1      | 0.38 |
| GPI       | 0.38 |
| FAM122C   | 0.38 |
| WDR33     | 0.38 |
| CEP290    | 0.38 |
| RBM41     | 0.38 |
| MYBBP1A   | 0.38 |
| ISCA2     | 0.38 |
| DIAPH2    | 0.38 |
| SNRPF     | 0.38 |
| SPR       | 0.38 |
| RRS1      | 0.38 |
| NOC3L     | 0.38 |
| CCNK      | 0.38 |
| BCAS2     | 0.38 |
| RPA3      | 0.38 |
| C14orf106 | 0.38 |
| DDX47     | 0.38 |
| MRPL47    | 0.38 |
| NSL1      | 0.38 |
| OBFC2B    | 0.38 |



|              |      |
|--------------|------|
| SUV39H1      | 0.38 |
| SNAP47       | 0.38 |
| SNRNP27      | 0.38 |
| BRCA1        | 0.38 |
| SCHIP1       | 0.38 |
| AHCTF1       | 0.38 |
| FH           | 0.38 |
| NLK          | 0.38 |
| NDUFB5       | 0.38 |
| TAF1         | 0.38 |
| DUT          | 0.38 |
| KPNA4        | 0.38 |
| YAF2         | 0.38 |
| NUDT21       | 0.38 |
| YWHAE        | 0.38 |
| MRPL17       | 0.38 |
| C6orf115     | 0.38 |
| RAD21        | 0.38 |
| UBXN2A       | 0.38 |
| ATXN10       | 0.38 |
| CHRAC1       | 0.38 |
| PDXP         | 0.38 |
| TFB1M        | 0.38 |
| CHML         | 0.38 |
| UBE2CBP      | 0.38 |
| NIPSNAP1     | 0.38 |
| GTF2H4       | 0.38 |
| GPN1         | 0.38 |
| SELT         | 0.38 |
| NPM1         | 0.38 |
| LOC100130932 | 0.38 |
| DUSP12       | 0.38 |
| TFAP4        | 0.38 |
| ZNF639       | 0.38 |
| COPS2        | 0.38 |
| HNRNPH3      | 0.38 |
| POLE2        | 0.38 |
| EIF2AK1      | 0.38 |
| HMMR         | 0.38 |
| KIAA1804     | 0.38 |
| SGOL2        | 0.38 |
| C14orf101    | 0.38 |
| TCP1         | 0.37 |
| EIF3J        | 0.37 |
| NCL          | 0.37 |
| LAPTM4B      | 0.37 |

|          |      |
|----------|------|
| GPHN     | 0.37 |
| TTC5     | 0.37 |
| FBXO5    | 0.37 |
| FUBP1    | 0.37 |
| SRRT     | 0.37 |
| U2AF2    | 0.37 |
| XPNPEP3  | 0.37 |
| ZC3H15   | 0.37 |
| SMARCB1  | 0.37 |
| CKS1B    | 0.37 |
| STRAP    | 0.37 |
| TP53BP1  | 0.37 |
| FAM92A1  | 0.37 |
| C8orf76  | 0.37 |
| CEP152   | 0.37 |
| PA2G4P4  | 0.37 |
| MAGOHB   | 0.37 |
| OIP5     | 0.37 |
| TYW1     | 0.37 |
| MDH1     | 0.37 |
| KIF11    | 0.37 |
| FAM133B  | 0.37 |
| CCDC99   | 0.37 |
| ZBTB2    | 0.37 |
| MND1     | 0.37 |
| PPIL4    | 0.37 |
| TMEM170A | 0.37 |
| FANCA    | 0.37 |
| RANBP1   | 0.37 |
| EPCAM    | 0.37 |
| SLC38A6  | 0.37 |
| RBM45    | 0.37 |
| TMED8    | 0.37 |
| MCM7     | 0.37 |
| TAF15    | 0.37 |
| NDUFA6   | 0.37 |
| KIF20B   | 0.37 |
| EEF1E1   | 0.37 |
| NUP54    | 0.37 |
| DLEU1    | 0.37 |
| METTLL5  | 0.37 |
| PSRC1    | 0.37 |
| DNAJB11  | 0.37 |
| TARDBP   | 0.37 |
| AZIN1    | 0.37 |
| YARS2    | 0.37 |

|           |      |
|-----------|------|
| METTL10   | 0.37 |
| PLEKHA3   | 0.37 |
| TGDS      | 0.37 |
| CDC73     | 0.37 |
| ZFR       | 0.37 |
| CYCS      | 0.37 |
| NASP      | 0.37 |
| C14orf126 | 0.37 |
| C4orf43   | 0.37 |
| ENOPH1    | 0.37 |
| SMARCA1   | 0.37 |
| ELAVL1    | 0.37 |
| RBM25     | 0.37 |
| TRMT5     | 0.37 |
| C1orf43   | 0.37 |
| DNAH14    | 0.37 |
| RAD51C    | 0.37 |
| BFAR      | 0.37 |
| ZNF273    | 0.37 |
| FUNDC2    | 0.37 |
| SLC25A3   | 0.37 |
| CCNB1     | 0.37 |
| CCDC43    | 0.37 |
| L2HGDH    | 0.37 |
| PIGF      | 0.37 |
| XIAP      | 0.37 |
| MRPL13    | 0.37 |
| UBE2O     | 0.37 |
| ALKBH1    | 0.37 |
| RNF34     | 0.37 |
| INTS8     | 0.37 |
| IVD       | 0.37 |
| RAD54L    | 0.37 |
| SSBP1     | 0.37 |
| SUPT7L    | 0.37 |
| SKA2      | 0.37 |
| CENPM     | 0.37 |
| ABI2      | 0.37 |
| NUDCD2    | 0.37 |
| NUP35     | 0.37 |
| HSP90AB1  | 0.37 |
| ATP13A3   | 0.37 |
| RPS4X     | 0.37 |
| CISD2     | 0.37 |
| JOSD1     | 0.37 |
| TBL2      | 0.37 |

|          |      |
|----------|------|
| MTPAP    | 0.37 |
| ODF2     | 0.37 |
| DDX54    | 0.37 |
| SDHC     | 0.37 |
| NOLC1    | 0.37 |
| MRPL16   | 0.37 |
| DHODH    | 0.37 |
| SLC10A3  | 0.37 |
| PIR      | 0.36 |
| SNAPC1   | 0.36 |
| FAM161A  | 0.36 |
| C1orf107 | 0.36 |
| LCLAT1   | 0.36 |
| NDUFA12  | 0.36 |
| MTX2     | 0.36 |
| FAM127C  | 0.36 |
| PPP2R5C  | 0.36 |
| NUBPL    | 0.36 |
| FAM136A  | 0.36 |
| LRRC40   | 0.36 |
| SCML1    | 0.36 |
| PPA1     | 0.36 |
| PAK2     | 0.36 |
| SAAL1    | 0.36 |
| POLE3    | 0.36 |
| OPA1     | 0.36 |
| TTC27    | 0.36 |
| TRMT11   | 0.36 |
| C7orf11  | 0.36 |
| CCT7     | 0.36 |
| IDH3G    | 0.36 |
| DNTTIP2  | 0.36 |
| RFC3     | 0.36 |
| TMEM18   | 0.36 |
| PDCD2L   | 0.36 |
| FAM60A   | 0.36 |
| LSM6     | 0.36 |
| CEP78    | 0.36 |
| RRM1     | 0.36 |
| ZNHIT3   | 0.36 |
| NUSAP1   | 0.36 |
| DUS4L    | 0.36 |
| TLK1     | 0.36 |
| URB2     | 0.36 |
| PAPOLG   | 0.36 |
| TCERG1   | 0.36 |

|           |      |
|-----------|------|
| C14orf142 | 0.36 |
| TSFM      | 0.36 |
| CTDSPL2   | 0.36 |
| COMMD2    | 0.36 |
| GPRASP2   | 0.36 |
| PTBP1     | 0.36 |
| SF1       | 0.36 |
| MRPS5     | 0.36 |
| ABCB10    | 0.36 |
| KLHL12    | 0.36 |
| KHSRP     | 0.36 |
| POLR2C    | 0.36 |
| TH1L      | 0.36 |
| UBXN4     | 0.36 |
| FXN       | 0.36 |
| ACBD6     | 0.36 |
| YEATS2    | 0.36 |
| PRIM1     | 0.36 |
| EIF2A     | 0.36 |
| NVL       | 0.36 |
| RPS7      | 0.36 |
| UBE2Q1    | 0.36 |
| MTERF     | 0.36 |
| C2orf44   | 0.36 |
| TPI1P2    | 0.36 |
| OXA1L     | 0.36 |
| PSMD12    | 0.36 |
| ADORA2B   | 0.36 |
| DEK       | 0.36 |
| NFU1      | 0.36 |
| RNF41     | 0.36 |
| ZRANB3    | 0.36 |
| KIFC1     | 0.36 |
| RNF2      | 0.36 |
| SKA1      | 0.36 |
| NUDT3     | 0.36 |
| RFWD3     | 0.36 |
| HNRNPAB   | 0.36 |
| ABHD3     | 0.36 |
| SLC29A2   | 0.36 |
| UCHL5     | 0.36 |
| TRIM59    | 0.36 |
| MRPL10    | 0.36 |
| NUP88     | 0.36 |
| WDR61     | 0.36 |
| UXS1      | 0.36 |

|          |      |
|----------|------|
| FARSB    | 0.36 |
| IFT80    | 0.36 |
| TFRC     | 0.36 |
| NAA25    | 0.36 |
| CTAGE5   | 0.36 |
| ELF4     | 0.36 |
| ZNF75D   | 0.36 |
| SIRT5    | 0.36 |
| EML4     | 0.36 |
| CBWD2    | 0.36 |
| PDIA6    | 0.36 |
| METTL1   | 0.36 |
| MASTL    | 0.36 |
| DCAF7    | 0.36 |
| PLK4     | 0.36 |
| MRPL18   | 0.36 |
| COQ6     | 0.36 |
| SASS6    | 0.36 |
| UBE2C    | 0.36 |
| CXorf57  | 0.36 |
| STRBP    | 0.36 |
| CENPF    | 0.36 |
| TPX2     | 0.36 |
| MTMR1    | 0.36 |
| FAM98B   | 0.36 |
| ATF1     | 0.36 |
| PAK1IP1  | 0.36 |
| GTF2A2   | 0.36 |
| TTC8     | 0.36 |
| RABL2B   | 0.36 |
| ZNF207   | 0.36 |
| SIVA1    | 0.36 |
| NETO2    | 0.36 |
| MRPS14   | 0.36 |
| SLC25A32 | 0.36 |
| NCAPG2   | 0.36 |
| KIF2C    | 0.36 |
| M6PR     | 0.36 |
| GIT1     | 0.36 |
| SHCBP1   | 0.36 |
| ATAD2    | 0.36 |
| EWSR1    | 0.36 |
| ACN9     | 0.36 |
| POC1B    | 0.36 |
| TMEM216  | 0.35 |
| SUMO1    | 0.35 |

|          |      |
|----------|------|
| ZNF146   | 0.35 |
| PPID     | 0.35 |
| C9orf30  | 0.35 |
| HMGXB4   | 0.35 |
| SLC25A15 | 0.35 |
| FAM20B   | 0.35 |
| COX16    | 0.35 |
| C1orf96  | 0.35 |
| CWC22    | 0.35 |
| HAUS7    | 0.35 |
| SHMT2    | 0.35 |
| MGC12982 | 0.35 |
| ORC4L    | 0.35 |
| ZNF642   | 0.35 |
| PUS7     | 0.35 |
| RRM2     | 0.35 |
| TSPAN6   | 0.35 |
| TSR1     | 0.35 |
| CCDC88A  | 0.35 |
| GEMIN4   | 0.35 |
| PFAS     | 0.35 |
| SUZ12    | 0.35 |
| TXNL4B   | 0.35 |
| ANKMY2   | 0.35 |
| FAM36A   | 0.35 |
| LASS2    | 0.35 |
| MARK1    | 0.35 |
| PPIG     | 0.35 |
| TADA2A   | 0.35 |
| C16orf52 | 0.35 |
| ENY2     | 0.35 |
| WTAP     | 0.35 |
| ETV5     | 0.35 |
| GPR89A   | 0.35 |
| DNAJC19  | 0.35 |
| C2orf49  | 0.35 |
| WDR89    | 0.35 |
| KIAA0753 | 0.35 |
| LIPT1    | 0.35 |
| SETD3    | 0.35 |
| PABPN1   | 0.35 |
| APOO     | 0.35 |
| TTC26    | 0.35 |
| HEATR1   | 0.35 |
| TSR2     | 0.35 |
| PDIA4    | 0.35 |

|           |      |
|-----------|------|
| AARS      | 0.35 |
| C12orf73  | 0.35 |
| CCT8      | 0.35 |
| C6orf182  | 0.35 |
| NCAPD3    | 0.35 |
| C17orf95  | 0.35 |
| CENPE     | 0.35 |
| PIGH      | 0.35 |
| NIF3L1    | 0.35 |
| CCDC55    | 0.35 |
| COG2      | 0.35 |
| SNRPE     | 0.35 |
| NUP43     | 0.35 |
| NMD3      | 0.35 |
| EXOC6     | 0.35 |
| SLC41A1   | 0.35 |
| FBXO22    | 0.35 |
| CHEK1     | 0.35 |
| EXOSC9    | 0.35 |
| CWF19L1   | 0.35 |
| PANX2     | 0.35 |
| ANAPC5    | 0.35 |
| TAF9B     | 0.35 |
| TPI1      | 0.35 |
| ASCC1     | 0.35 |
| VPS29     | 0.35 |
| KIAA0391  | 0.35 |
| SRP54     | 0.35 |
| ESCO2     | 0.35 |
| TAF5L     | 0.35 |
| SEN2      | 0.35 |
| PDK1      | 0.35 |
| APOA1BP   | 0.35 |
| C7orf44   | 0.35 |
| MUTYH     | 0.35 |
| SLC4A5    | 0.35 |
| ZFP1      | 0.35 |
| TWISTNB   | 0.35 |
| CKAP2L    | 0.35 |
| ELP4      | 0.35 |
| DERA      | 0.35 |
| THAP10    | 0.35 |
| PRTFDC1   | 0.35 |
| C14orf138 | 0.35 |
| TRIM37    | 0.35 |
| ATP6AP1   | 0.35 |



|         |      |
|---------|------|
| TIMM9   | 0.35 |
| EIF5    | 0.35 |
| POLR2K  | 0.35 |
| ARMCX6  | 0.35 |
| PIGW    | 0.35 |
| SAE1    | 0.35 |
| PRPS2   | 0.35 |
| ANAPC10 | 0.35 |
| KCMF1   | 0.35 |
| EME1    | 0.35 |
| ADAM17  | 0.35 |
| ADPGK   | 0.35 |
| LTV1    | 0.35 |
| RPL13P5 | 0.35 |
| ATG5    | 0.35 |
| GFM1    | 0.35 |
| TK1     | 0.35 |
| PA2G4   | 0.35 |
| CCT5    | 0.35 |
| CIAO1   | 0.34 |
| EXOSC7  | 0.34 |
| UNG     | 0.34 |
| SMC6    | 0.34 |
| PRPF3   | 0.34 |
| PAWR    | 0.34 |
| NUP85   | 0.34 |
| E2F4    | 0.34 |
| AKR1E2  | 0.34 |
| KRTCAP3 | 0.34 |
| CDT1    | 0.34 |
| C5orf30 | 0.34 |
| CCDC21  | 0.34 |
| CDCA2   | 0.34 |
| SBDSP1  | 0.34 |
| PK3     | 0.34 |
| KTN1    | 0.34 |
| PSMC6   | 0.34 |
| CPSF3   | 0.34 |
| TMEM14A | 0.34 |
| MRPL50  | 0.34 |
| RBM12   | 0.34 |
| MSH5    | 0.34 |
| NUDT11  | 0.34 |
| DHX57   | 0.34 |
| PATZ1   | 0.34 |
| CKAP5   | 0.34 |

|           |      |
|-----------|------|
| DHX36     | 0.34 |
| FADS1     | 0.34 |
| C14orf145 | 0.34 |
| TTC21B    | 0.34 |
| GLOD4     | 0.34 |
| PRMT1     | 0.34 |
| SEMA4F    | 0.34 |
| TTLL5     | 0.34 |
| HNRNPA1   | 0.34 |
| SCO1      | 0.34 |
| TIGD1     | 0.34 |
| TAF4      | 0.34 |
| PSME4     | 0.34 |
| KARS      | 0.34 |
| CBFB      | 0.34 |
| HSP90B1   | 0.34 |
| MEST      | 0.34 |
| C6orf72   | 0.34 |
| NCAPG     | 0.34 |
| MOSC1     | 0.34 |
| DNAJA3    | 0.34 |
| SF3A3     | 0.34 |
| RPP30     | 0.34 |
| RINT1     | 0.34 |
| ORC3L     | 0.34 |
| CDAN1     | 0.34 |
| TGS1      | 0.34 |
| CLK2P     | 0.34 |
| MIS12     | 0.34 |
| MAGOH     | 0.34 |
| RYK       | 0.34 |
| GLRX2     | 0.34 |
| C7orf42   | 0.34 |
| PDCD7     | 0.34 |
| TSNAX     | 0.34 |
| LOC728640 | 0.34 |
| EAPP      | 0.34 |
| BCORL1    | 0.34 |
| DCTPP1    | 0.34 |
| MLF2      | 0.34 |
| CPSF4     | 0.34 |
| ZNF275    | 0.34 |
| YIPF6     | 0.34 |
| CSPP1     | 0.34 |
| H2AFY2    | 0.34 |
| VEZT      | 0.34 |

|           |      |
|-----------|------|
| NUFIP1    | 0.34 |
| TARBP1    | 0.34 |
| SLC25A36  | 0.34 |
| DDX10     | 0.34 |
| DGKE      | 0.34 |
| PFDN4     | 0.34 |
| RRN3      | 0.34 |
| TAF1B     | 0.34 |
| ZNF410    | 0.34 |
| PHKA1     | 0.34 |
| SMN2      | 0.34 |
| CD46      | 0.34 |
| BHLHB9    | 0.34 |
| SNAPIN    | 0.34 |
| C14orf135 | 0.34 |
| DENND5A   | 0.34 |
| NUP98     | 0.34 |
| ABHD11    | 0.34 |
| ACIN1     | 0.34 |
| RNASEH2A  | 0.34 |
| BAZ1B     | 0.34 |
| IMMP1L    | 0.34 |
| SLMO2     | 0.34 |
| EIF3H     | 0.34 |
| MDC1      | 0.34 |
| RPE       | 0.34 |
| POLR1B    | 0.34 |
| FCF1      | 0.34 |
| LRP8      | 0.34 |
| PSMA1     | 0.34 |
| FAM192A   | 0.34 |
| GNPDA1    | 0.34 |
| BCAP31    | 0.34 |
| CS        | 0.34 |
| MRPS30    | 0.34 |
| TUBE1     | 0.34 |
| C1D       | 0.34 |
| MED9      | 0.34 |
| ZNF326    | 0.34 |
| NDUFAF4   | 0.34 |
| POLR3K    | 0.34 |
| TMEM69    | 0.34 |
| SPAST     | 0.34 |
| DIAPH3    | 0.34 |
| ORC1L     | 0.34 |
| NDUFA1    | 0.34 |

|           |      |
|-----------|------|
| PMPCB     | 0.34 |
| PPA2      | 0.34 |
| ERGIC2    | 0.34 |
| USP27X    | 0.34 |
| AIDA      | 0.34 |
| LOC144438 | 0.34 |
| DVL2      | 0.34 |
| DSG2      | 0.34 |
| HS6ST2    | 0.34 |
| LOC646762 | 0.34 |
| RBM12B    | 0.34 |
| FAM131A   | 0.34 |
| FIP1L1    | 0.34 |
| YLPM1     | 0.34 |
| SART3     | 0.34 |
| RNF13     | 0.34 |
| NARG2     | 0.34 |
| TUBB      | 0.34 |
| RSRC1     | 0.34 |
| GPATCH2   | 0.34 |
| GMFB      | 0.34 |
| NRF1      | 0.34 |
| RAB15     | 0.34 |
| SENP3     | 0.34 |
| CPSF2     | 0.34 |
| GINS3     | 0.34 |
| YIPF4     | 0.34 |
| TCEAL8    | 0.34 |
| LASS5     | 0.34 |
| HPS3      | 0.34 |
| SMEK1     | 0.34 |
| AATF      | 0.34 |
| PGAM5     | 0.34 |
| WBP5      | 0.34 |
| TSEN34    | 0.34 |
| ANGEL2    | 0.34 |
| MYCBP     | 0.34 |
| RPL26L1   | 0.34 |
| ECD       | 0.34 |
| TKT       | 0.34 |
| B4GALNT1  | 0.34 |
| RAD18     | 0.34 |
| MITD1     | 0.34 |
| CCDC77    | 0.34 |
| HSD17B7   | 0.34 |
| ALS2      | 0.34 |

|           |      |
|-----------|------|
| TTC19     | 0.34 |
| MPHOSPH10 | 0.34 |
| CCDC7     | 0.34 |
| PPPDE1    | 0.34 |
| LSM14A    | 0.34 |
| PFN2      | 0.34 |
| ILF3      | 0.34 |
| CCDC58    | 0.34 |
| FAM49B    | 0.34 |
| CENPQ     | 0.33 |
| PPIL1     | 0.33 |
| AGPS      | 0.33 |
| FKBP4     | 0.33 |
| ETFA      | 0.33 |
| DNAJC9    | 0.33 |
| TRAIP     | 0.33 |
| ANKRD40   | 0.33 |
| SOCS4     | 0.33 |
| RDH11     | 0.33 |
| CYB5B     | 0.33 |
| MBTPS2    | 0.33 |
| UNC50     | 0.33 |
| SFXN4     | 0.33 |
| TBC1D8B   | 0.33 |
| ZNF280D   | 0.33 |
| FANCD2    | 0.33 |
| SMARCD1   | 0.33 |
| CTPS      | 0.33 |
| PPP1R2    | 0.33 |
| CHM       | 0.33 |
| FIGNL1    | 0.33 |
| WRN       | 0.33 |
| TMEM201   | 0.33 |
| FTSJ2     | 0.33 |
| SLC25A43  | 0.33 |
| ZNHIT6    | 0.33 |
| RHOT1     | 0.33 |
| KNTC1     | 0.33 |
| GTF3C3    | 0.33 |
| PRPF39    | 0.33 |
| MEMO1     | 0.33 |
| RCC1      | 0.33 |
| YWHAG     | 0.33 |
| PCBD1     | 0.33 |
| ACSL4     | 0.33 |
| FN3KRP    | 0.33 |

|           |      |
|-----------|------|
| CXorf40A  | 0.33 |
| TBP       | 0.33 |
| NIP7      | 0.33 |
| PLDN      | 0.33 |
| SNRPD3    | 0.33 |
| B3GALNT2  | 0.33 |
| APITD1    | 0.33 |
| CCAR1     | 0.33 |
| TOMM34    | 0.33 |
| EIF3D     | 0.33 |
| TAF9      | 0.33 |
| SDHD      | 0.33 |
| MICA      | 0.33 |
| MELK      | 0.33 |
| C13orf27  | 0.33 |
| MPP6      | 0.33 |
| PIGM      | 0.33 |
| RPP40     | 0.33 |
| TMEM209   | 0.33 |
| ABCE1     | 0.33 |
| GART      | 0.33 |
| PSMA2     | 0.33 |
| C5orf25   | 0.33 |
| GTPBP4    | 0.33 |
| DCUN1D4   | 0.33 |
| AFMID     | 0.33 |
| ZNF77     | 0.33 |
| MARS      | 0.33 |
| SFT2D1    | 0.33 |
| ORC5L     | 0.33 |
| IFT52     | 0.33 |
| NSMCE2    | 0.33 |
| ANLN      | 0.33 |
| ZWINT     | 0.33 |
| TMEM5     | 0.33 |
| PRR13     | 0.33 |
| RBM14     | 0.33 |
| LOC646214 | 0.33 |
| TIMELESS  | 0.33 |
| SEC62     | 0.33 |
| RNF8      | 0.33 |
| ZDHHC16   | 0.33 |
| GON4L     | 0.33 |
| ZNF92     | 0.33 |
| GDAP1     | 0.33 |
| ISG20L2   | 0.33 |

|            |      |
|------------|------|
| TMEM41B    | 0.33 |
| C1orf109   | 0.33 |
| MRPL39     | 0.33 |
| AP4S1      | 0.33 |
| CHERP      | 0.33 |
| METTL3     | 0.33 |
| ATIC       | 0.33 |
| ATP5G2     | 0.33 |
| FBXO11     | 0.33 |
| TPM3       | 0.33 |
| GEMIN6     | 0.33 |
| ZBTB41     | 0.33 |
| ZNF839     | 0.33 |
| BRI3BP     | 0.33 |
| C12orf41   | 0.33 |
| TTL        | 0.33 |
| TBL1XR1    | 0.33 |
| C6orf167   | 0.33 |
| RPL35A     | 0.33 |
| PMS1       | 0.33 |
| EIF3E      | 0.33 |
| CDKN2AIPNL | 0.33 |
| SETD4      | 0.33 |
| DDX20      | 0.33 |
| PELP1      | 0.33 |
| MAGEE1     | 0.33 |
| ANGEL1     | 0.33 |
| TCTEX1D2   | 0.33 |
| FAM3A      | 0.33 |
| PRMT3      | 0.33 |
| CTPS2      | 0.33 |
| SIX1       | 0.33 |
| FASTKD1    | 0.33 |
| IFT57      | 0.33 |
| POM121     | 0.33 |
| PPPDE2     | 0.33 |
| C2orf64    | 0.33 |
| SP3        | 0.33 |
| AGBL5      | 0.33 |
| NXT2       | 0.33 |
| MCM8       | 0.33 |
| PRDX6      | 0.33 |
| SMPD4      | 0.33 |
| FAM169A    | 0.33 |
| EPRS       | 0.33 |
| ERCC3      | 0.33 |

|           |      |
|-----------|------|
| EBAG9     | 0.33 |
| FLAD1     | 0.33 |
| ZCCHC8    | 0.33 |
| P2RX4     | 0.33 |
| LIG3      | 0.33 |
| FUNDC1    | 0.33 |
| COX15     | 0.33 |
| PDCD5     | 0.33 |
| DGUOK     | 0.33 |
| EIF1AX    | 0.33 |
| LUC7L2    | 0.33 |
| MKLN1     | 0.33 |
| MAPK1IP1L | 0.33 |
| YBX1      | 0.33 |
| CDC25A    | 0.33 |
| TMEM30B   | 0.33 |
| ASPH      | 0.33 |
| TMEM183A  | 0.33 |
| ZNF195    | 0.33 |
| RPL23AP7  | 0.33 |
| SEH1L     | 0.33 |
| DUSP11    | 0.33 |
| RCCD1     | 0.33 |
| MCM6      | 0.33 |
| EIF4A2    | 0.33 |
| TMX2      | 0.33 |
| LOC647288 | 0.33 |
| PMS2L1    | 0.33 |
| ELOVL5    | 0.33 |
| HSP90AB2P | 0.33 |
| C14orf19  | 0.33 |
| C12orf65  | 0.33 |
| CORO1C    | 0.33 |
| CLN6      | 0.33 |
| SR140     | 0.33 |
| C8orf33   | 0.33 |
| LOC440354 | 0.33 |
| SNRPD1    | 0.33 |
| SIN3A     | 0.33 |
| ESD       | 0.33 |
| CTCF      | 0.33 |
| PSMA4     | 0.33 |
| SEP15     | 0.33 |
| LPCAT3    | 0.33 |
| DIMT1L    | 0.32 |
| SFRS6     | 0.32 |



|           |      |
|-----------|------|
| ACOT2     | 0.32 |
| DNAJC25   | 0.32 |
| HSP90B3P  | 0.32 |
| PHF12     | 0.32 |
| LMNB1     | 0.32 |
| ZNRF3     | 0.32 |
| MTHFD1L   | 0.32 |
| ARHGAP11B | 0.32 |
| GMPR2     | 0.32 |
| MRPL33    | 0.32 |
| EFTUD2    | 0.32 |
| LSG1      | 0.32 |
| ARMC8     | 0.32 |
| SMYD5     | 0.32 |
| TMPO      | 0.32 |
| KIAA1524  | 0.32 |
| C19orf42  | 0.32 |
| ATP5S     | 0.32 |
| NSDHL     | 0.32 |
| SKA3      | 0.32 |
| HSPA9     | 0.32 |
| GIN54     | 0.32 |
| CBWD3     | 0.32 |
| FAH       | 0.32 |
| RIT1      | 0.32 |
| ZNF680    | 0.32 |
| DIS3L     | 0.32 |
| HDGF      | 0.32 |
| PITPNB    | 0.32 |
| WDSUB1    | 0.32 |
| MESDC2    | 0.32 |
| BIRC5     | 0.32 |
| TCEAL6    | 0.32 |
| COX7B     | 0.32 |
| TEX10     | 0.32 |
| SLC19A1   | 0.32 |
| MRPS16    | 0.32 |
| NR2C1     | 0.32 |
| ZNF746    | 0.32 |
| RAD51L1   | 0.32 |
| COIL      | 0.32 |
| CPSF7     | 0.32 |
| MYBL2     | 0.32 |
| JKAMP     | 0.32 |
| C12orf43  | 0.32 |
| MYO19     | 0.32 |

|          |      |
|----------|------|
| PARL     | 0.32 |
| GNL3     | 0.32 |
| ERAL1    | 0.32 |
| ZFP161   | 0.32 |
| MRPL15   | 0.32 |
| C17orf53 | 0.32 |
| ADCY3    | 0.32 |
| RNF7     | 0.32 |
| HAUS4    | 0.32 |
| BCL7A    | 0.32 |
| AAAS     | 0.32 |
| PPP5C    | 0.32 |
| TCEAL3   | 0.32 |
| GEMIN5   | 0.32 |
| KIAA1279 | 0.32 |
| RFWD2    | 0.32 |
| MYNN     | 0.32 |
| SUMO3    | 0.32 |
| RUVBL1   | 0.32 |
| ADO      | 0.32 |
| C1orf52  | 0.32 |
| SNRPA1   | 0.32 |
| HNRNPF   | 0.32 |
| RABEP1   | 0.32 |
| C10orf4  | 0.32 |
| AKT1     | 0.32 |
| SUDS3    | 0.32 |
| MOAP1    | 0.32 |
| RPS6KC1  | 0.32 |
| ANKRD36B | 0.32 |
| SMC3     | 0.32 |
| YWHAQ    | 0.32 |
| KIAA1704 | 0.32 |
| MOGS     | 0.32 |
| WBP11    | 0.32 |
| ORMDL1   | 0.32 |
| ATXN2    | 0.32 |
| MRPS9    | 0.32 |
| TRUB1    | 0.32 |
| COPS6    | 0.32 |
| EID1     | 0.32 |
| IARS     | 0.32 |
| LARP4    | 0.32 |
| TRIM16L  | 0.32 |
| PIGC     | 0.32 |
| CNPY2    | 0.32 |

|           |      |
|-----------|------|
| GPR180    | 0.32 |
| C11orf58  | 0.32 |
| ITGB1BP1  | 0.32 |
| PPM1B     | 0.32 |
| KLHDC5    | 0.32 |
| PSMD7     | 0.32 |
| RFXAP     | 0.32 |
| PCCB      | 0.32 |
| ARSK      | 0.32 |
| GSR       | 0.32 |
| DPM1      | 0.32 |
| THUMPD3   | 0.32 |
| G6PD      | 0.32 |
| WDR44     | 0.32 |
| NPM3      | 0.32 |
| MARS2     | 0.32 |
| LOC401588 | 0.32 |
| RPL23AP82 | 0.32 |
| SAV1      | 0.32 |
| NCEH1     | 0.32 |
| POC5      | 0.32 |
| LOC678655 | 0.32 |
| OSGEPL1   | 0.32 |
| PRPF40A   | 0.32 |
| WDR5      | 0.32 |
| TTC9C     | 0.32 |
| GTF2H3    | 0.32 |
| IMP4      | 0.32 |
| ALDH18A1  | 0.32 |
| WDR20     | 0.32 |
| PLXNB3    | 0.32 |
| RPL10     | 0.32 |
| GANAB     | 0.32 |
| PDSS1     | 0.32 |
| PSIP1     | 0.32 |
| XPOT      | 0.32 |
| C12orf45  | 0.32 |
| RNPS1     | 0.32 |
| DNAL1     | 0.32 |
| ZBTB25    | 0.32 |
| TCOF1     | 0.32 |
| SF3B3     | 0.32 |
| RPL36A    | 0.32 |
| DHX40     | 0.32 |
| REV1      | 0.32 |
| ARHGAP19  | 0.32 |

|           |      |
|-----------|------|
| EXOG      | 0.32 |
| RBBP5     | 0.32 |
| ACD       | 0.32 |
| NOL8      | 0.32 |
| FO XK2    | 0.32 |
| USP14     | 0.32 |
| C14orf149 | 0.32 |
| FAM120A   | 0.32 |
| TMEM106C  | 0.32 |
| SOD1      | 0.32 |
| TMEM223   | 0.32 |
| PKP4      | 0.32 |
| PCGF2     | 0.32 |
| C11orf82  | 0.32 |
| MSI2      | 0.32 |
| BAZ1A     | 0.32 |
| SLC25A38  | 0.32 |
| DAZAP1    | 0.32 |
| PSMC3IP   | 0.32 |
| ANAPC1    | 0.32 |
| IQGAP3    | 0.32 |
| BAT1      | 0.32 |
| THOC4     | 0.32 |
| DCLRE1A   | 0.32 |
| TRNT1     | 0.32 |
| RDH14     | 0.32 |
| RABEPK    | 0.32 |
| P4HA1     | 0.32 |
| C20orf20  | 0.32 |
| GATC      | 0.32 |
| SPC24     | 0.32 |
| COPZ1     | 0.32 |
| DGKG      | 0.32 |
| TROVE2    | 0.32 |
| ALOX12P2  | 0.32 |
| UBAP2L    | 0.32 |
| GGNBP2    | 0.32 |
| SNRNP40   | 0.32 |
| DBR1      | 0.32 |
| PDCL3     | 0.31 |
| SUZ12P    | 0.31 |
| RP9       | 0.31 |
| OSGEP     | 0.31 |
| CGRRF1    | 0.31 |
| INTS7     | 0.31 |
| DCAF4     | 0.31 |

|          |      |
|----------|------|
| NAA38    | 0.31 |
| FAIM     | 0.31 |
| RPUSD2   | 0.31 |
| ZNF594   | 0.31 |
| KLC2     | 0.31 |
| SEC61A2  | 0.31 |
| OST4     | 0.31 |
| CLK2     | 0.31 |
| PABPC3   | 0.31 |
| F8       | 0.31 |
| HMGB2    | 0.31 |
| FAM120C  | 0.31 |
| PDIA5    | 0.31 |
| TMEM67   | 0.31 |
| AKAP1    | 0.31 |
| THNSL1   | 0.31 |
| ASNS     | 0.31 |
| METT5D1  | 0.31 |
| PHTF2    | 0.31 |
| CCDC112  | 0.31 |
| SMEK2    | 0.31 |
| PRR3     | 0.31 |
| C6orf162 | 0.31 |
| PPP1R13B | 0.31 |
| FKRP     | 0.31 |
| PPP1R2P3 | 0.31 |
| EIF2C3   | 0.31 |
| DERL2    | 0.31 |
| MSTO1    | 0.31 |
| POT1     | 0.31 |
| IGF2BP2  | 0.31 |
| CHST7    | 0.31 |
| ARFGAP3  | 0.31 |
| NACC1    | 0.31 |
| SNRNP200 | 0.31 |
| LRRC57   | 0.31 |
| PHB      | 0.31 |
| POLA2    | 0.31 |
| NBN      | 0.31 |
| PHKA2    | 0.31 |
| TSSC1    | 0.31 |
| PRPF19   | 0.31 |
| CDC25C   | 0.31 |
| C8orf37  | 0.31 |
| TMTC3    | 0.31 |
| SGOL1    | 0.31 |

|          |      |
|----------|------|
| KIAA0406 | 0.31 |
| CABLES2  | 0.31 |
| PIN4     | 0.31 |
| DPH5     | 0.31 |
| HNRNPM   | 0.31 |
| RAVER2   | 0.31 |
| NAF1     | 0.31 |
| KIF20A   | 0.31 |
| C2orf28  | 0.31 |
| CCDC115  | 0.31 |
| C3orf21  | 0.31 |
| C15orf40 | 0.31 |
| CCDC34   | 0.31 |
| C9orf140 | 0.31 |
| SMS      | 0.31 |
| E2F7     | 0.31 |
| FAM3C    | 0.31 |
| RAD23A   | 0.31 |
| MINPP1   | 0.31 |
| LRP12    | 0.31 |
| AKAP8    | 0.31 |
| RMND1    | 0.31 |
| FANCL    | 0.31 |
| EMG1     | 0.31 |
| RBM19    | 0.31 |
| DYNLL2   | 0.31 |
| CDADC1   | 0.31 |
| CMC1     | 0.31 |
| ATXN3    | 0.31 |
| USP45    | 0.31 |
| SCARB1   | 0.31 |
| SFRS8    | 0.31 |
| ITGB3BP  | 0.31 |
| MRPL32   | 0.31 |
| ERP29    | 0.31 |
| SF3B1    | 0.31 |
| FBXO4    | 0.31 |
| GNPAT    | 0.31 |
| AGMAT    | 0.31 |
| CEP57    | 0.31 |
| TRAP1    | 0.31 |
| CLCC1    | 0.31 |
| TAF5     | 0.31 |
| IPO4     | 0.31 |
| RAD1     | 0.31 |
| CEP68    | 0.31 |

|           |      |
|-----------|------|
| NAA40     | 0.31 |
| TMEM68    | 0.31 |
| PPIH      | 0.31 |
| ZC3HC1    | 0.31 |
| AGPAT5    | 0.31 |
| FTHL3     | 0.31 |
| RPL39L    | 0.31 |
| NOP2      | 0.31 |
| SLC1A5    | 0.31 |
| CHCHD7    | 0.31 |
| GATAD1    | 0.31 |
| NANP      | 0.31 |
| C21orf45  | 0.31 |
| SMCR7L    | 0.31 |
| CAD       | 0.31 |
| ANAPC16   | 0.31 |
| MAP1B     | 0.31 |
| IFT81     | 0.31 |
| POFUT1    | 0.31 |
| CETN3     | 0.31 |
| SNX6      | 0.31 |
| LOC728758 | 0.31 |
| C1orf112  | 0.31 |
| ZMYM5     | 0.31 |
| MAGEF1    | 0.31 |
| WDR92     | 0.31 |
| SEC22C    | 0.31 |
| CABYR     | 0.31 |
| TOMM5     | 0.31 |
| TCF20     | 0.31 |
| C2orf60   | 0.31 |
| THOC5     | 0.31 |
| SLC35B2   | 0.31 |
| ECE2      | 0.31 |
| GTPBP3    | 0.31 |
| SSR3      | 0.31 |
| DDX52     | 0.31 |
| TMED2     | 0.31 |
| MTA3      | 0.31 |
| PSAT1     | 0.31 |
| C15orf24  | 0.31 |
| IWS1      | 0.31 |
| PCGF1     | 0.31 |
| PFDN2     | 0.31 |
| PMS2L4    | 0.31 |
| ATAD1     | 0.31 |

|          |      |
|----------|------|
| PPP2R5A  | 0.31 |
| DDX39    | 0.31 |
| PPP1R12A | 0.31 |
| PLS3     | 0.31 |
| CNTLN    | 0.31 |
| DDX59    | 0.31 |
| BAG5     | 0.31 |
| C1orf57  | 0.31 |
| C2orf47  | 0.31 |
| ZUFSP    | 0.31 |
| EXOC5    | 0.31 |
| CENPH    | 0.31 |
| CPNE2    | 0.31 |
| PAXIP1   | 0.31 |
| SLBP     | 0.31 |
| ERLEC1   | 0.31 |
| THOC3    | 0.31 |
| ACYP1    | 0.31 |
| RPIA     | 0.31 |
| HNRPDL   | 0.31 |
| SIX4     | 0.31 |
| LMBR1    | 0.31 |
| GEN1     | 0.31 |
| WHSC1    | 0.31 |
| AP3M2    | 0.31 |
| ABCF2    | 0.31 |
| EIF2S1   | 0.31 |
| MTF2     | 0.31 |
| C9orf21  | 0.31 |
| RAB4A    | 0.31 |
| TMEM39B  | 0.31 |
| FARSA    | 0.31 |
| TMEM85   | 0.31 |
| ALKBH5   | 0.31 |
| WDR73    | 0.31 |
| SLC37A3  | 0.31 |
| PRICKLE3 | 0.31 |
| C5orf28  | 0.31 |
| C12orf52 | 0.31 |
| MAPK9    | 0.31 |
| KDM1A    | 0.31 |
| VDAC3    | 0.31 |
| EXOSC8   | 0.31 |
| ZC3H18   | 0.31 |
| XPR1     | 0.31 |
| EXOSC1   | 0.31 |



|          |      |
|----------|------|
| NOP56    | 0.31 |
| CDK2AP1  | 0.31 |
| AKR1C3   | 0.31 |
| PDHA1    | 0.31 |
| CSTF1    | 0.31 |
| CEP170   | 0.31 |
| CHAF1A   | 0.31 |
| KLRAQ1   | 0.31 |
| PSMD2    | 0.31 |
| ACTR3B   | 0.31 |
| C10orf2  | 0.31 |
| ESCO1    | 0.31 |
| MPV17    | 0.31 |
| DYNC2LI1 | 0.31 |
| GAPDH    | 0.31 |
| LYRM2    | 0.31 |
| KATNA1   | 0.31 |
| RAG1AP1  | 0.31 |
| TMEM20   | 0.31 |
| RPF2     | 0.31 |
| MLX      | 0.31 |
| SMARCD2  | 0.31 |
| RPA1     | 0.31 |
| PIGS     | 0.31 |
| TMEM194A | 0.31 |
| PSME3    | 0.31 |
| NAT10    | 0.3  |
| EIF1     | 0.3  |
| FUS      | 0.3  |
| POLD2    | 0.3  |
| CENPJ    | 0.3  |
| ALS2CR4  | 0.3  |
| PCNP     | 0.3  |
| SCLT1    | 0.3  |
| NOL7     | 0.3  |
| ZNF830   | 0.3  |
| RPN2     | 0.3  |
| SAFB     | 0.3  |
| KAT2A    | 0.3  |
| CNOT10   | 0.3  |
| UBE2NL   | 0.3  |
| C15orf57 | 0.3  |
| MEAF6    | 0.3  |
| CHAF1B   | 0.3  |
| DSN1     | 0.3  |
| CDC5L    | 0.3  |

|          |     |
|----------|-----|
| GNL2     | 0.3 |
| TRAPPC6B | 0.3 |
| PIGX     | 0.3 |
| POLR2G   | 0.3 |
| ITPK1    | 0.3 |
| TOP3A    | 0.3 |
| SLC16A14 | 0.3 |
| METTL2B  | 0.3 |
| SCARNA12 | 0.3 |
| COQ5     | 0.3 |
| PHOSPHO2 | 0.3 |
| EXOSC3   | 0.3 |
| DMTF1    | 0.3 |
| C6orf57  | 0.3 |
| FAM91A1  | 0.3 |
| GNA13    | 0.3 |
| PIGB     | 0.3 |
| C6orf211 | 0.3 |
| HEBP1    | 0.3 |
| BRD7     | 0.3 |
| RBBP8    | 0.3 |
| CCDC91   | 0.3 |
| PSMB4    | 0.3 |
| PDIA3P   | 0.3 |
| C16orf87 | 0.3 |
| ANKRD32  | 0.3 |
| NME1     | 0.3 |
| DCK      | 0.3 |
| CHID1    | 0.3 |
| ATP5B    | 0.3 |
| MCM3     | 0.3 |
| SOX12    | 0.3 |
| PRPF38B  | 0.3 |
| PRKCSH   | 0.3 |
| ZNF286A  | 0.3 |
| HTRA2    | 0.3 |
| ALG10    | 0.3 |
| NUDT5    | 0.3 |
| ATP5C1   | 0.3 |
| UBP1     | 0.3 |
| HMGA1    | 0.3 |
| CASK     | 0.3 |
| SNX17    | 0.3 |
| SLC26A10 | 0.3 |
| LMNB2    | 0.3 |
| SAMM50   | 0.3 |

|          |     |
|----------|-----|
| MRPS24   | 0.3 |
| PHB2     | 0.3 |
| GPX2     | 0.3 |
| SMURF2   | 0.3 |
| HAUS1    | 0.3 |
| DYNC1LI1 | 0.3 |
| RAB2B    | 0.3 |
| GDF11    | 0.3 |
| INTS2    | 0.3 |
| CENPK    | 0.3 |
| ATXN2L   | 0.3 |
| TM9SF1   | 0.3 |
| CRYZL1   | 0.3 |
| TRAF3    | 0.3 |
| TEX261   | 0.3 |
| PCLO     | 0.3 |
| ARIH2    | 0.3 |
| SMARCA5  | 0.3 |
| SRBD1    | 0.3 |
| CDC20    | 0.3 |
| CDC7     | 0.3 |
| OSTC     | 0.3 |
| AIFM2    | 0.3 |
| ZNF777   | 0.3 |
| IPO7     | 0.3 |
| QTRTD1   | 0.3 |
| MLH3     | 0.3 |
| PAK1     | 0.3 |
| NSMCE4A  | 0.3 |
| SLC33A1  | 0.3 |
| LIN52    | 0.3 |
| MOSPD1   | 0.3 |
| FASTKD2  | 0.3 |
| CDC27    | 0.3 |
| PSMG1    | 0.3 |
| TMEM38B  | 0.3 |
| LUC7L3   | 0.3 |
| SNHG1    | 0.3 |
| RBM39    | 0.3 |
| C1orf124 | 0.3 |
| MKRN1    | 0.3 |
| UGGT1    | 0.3 |
| PCMT1    | 0.3 |
| ZBTB26   | 0.3 |
| MED6     | 0.3 |
| POLR3C   | 0.3 |

|          |     |
|----------|-----|
| RNF220   | 0.3 |
| C19orf48 | 0.3 |
| PRPF18   | 0.3 |
| POLR3H   | 0.3 |
| HAUS5    | 0.3 |
| PEX19    | 0.3 |
| FAM55C   | 0.3 |
| PMM1     | 0.3 |
| GCLM     | 0.3 |
| RPRD1B   | 0.3 |
| FBXO7    | 0.3 |
| BTBD1    | 0.3 |
| IMPA1    | 0.3 |
| TFCP2    | 0.3 |
| EHHADH   | 0.3 |
| ACTR3    | 0.3 |
| THAP11   | 0.3 |
| PPP1R8   | 0.3 |
| POLA1    | 0.3 |
| UBR5     | 0.3 |
| MPI      | 0.3 |
| EIF5A2   | 0.3 |
| NT5DC3   | 0.3 |
| RPL6     | 0.3 |
| SNX27    | 0.3 |
| NCAPD2   | 0.3 |
| RNF219   | 0.3 |
| C9orf80  | 0.3 |
| HIP1     | 0.3 |
| ZNF638   | 0.3 |
| EPS8     | 0.3 |
| C8orf39  | 0.3 |
| RTF1     | 0.3 |
| ZNF7     | 0.3 |
| MRPS28   | 0.3 |
| POC1A    | 0.3 |
| ENO2     | 0.3 |
| C7orf28A | 0.3 |
| SCFD1    | 0.3 |
| AKR1B1   | 0.3 |
| HYLS1    | 0.3 |
| BBS5     | 0.3 |
| RIC8B    | 0.3 |
| USP36    | 0.3 |
| METTL13  | 0.3 |
| PTGR2    | 0.3 |

|           |     |
|-----------|-----|
| IDH1      | 0.3 |
| UBTF      | 0.3 |
| MTCH2     | 0.3 |
| DCAF17    | 0.3 |
| C14orf147 | 0.3 |
| NAGA      | 0.3 |
| TTC32     | 0.3 |
| ATF4      | 0.3 |
| ZNF696    | 0.3 |
| MRPL44    | 0.3 |
| ZNF140    | 0.3 |
| TAF6      | 0.3 |
| ZZZ3      | 0.3 |
| ZXDB      | 0.3 |
| KDM3A     | 0.3 |
| PFKP      | 0.3 |
| HOMEZ     | 0.3 |
| XRN2      | 0.3 |
| ATR       | 0.3 |
| THAP1     | 0.3 |
| C17orf85  | 0.3 |
| DLST      | 0.3 |
| IMPAD1    | 0.3 |
| GCLC      | 0.3 |
| ZDHHC17   | 0.3 |
| SNX5      | 0.3 |
| ATP5G3    | 0.3 |
| TUBGCP4   | 0.3 |
| TMEM41A   | 0.3 |
| MKS1      | 0.3 |
| MTM1      | 0.3 |
| MRPS7     | 0.3 |
| C3orf17   | 0.3 |
| SETD6     | 0.3 |
| ARMC10    | 0.3 |
| PUS7L     | 0.3 |
| ZP3       | 0.3 |
| WDR35     | 0.3 |
| EIF2AK4   | 0.3 |
| FAM83D    | 0.3 |
| CAMKK2    | 0.3 |
| ZNF131    | 0.3 |
| ZNF182    | 0.3 |
| GINS1     | 0.3 |
| MUDENG    | 0.3 |
| C1orf174  | 0.3 |

|          |     |
|----------|-----|
| EP400    | 0.3 |
| CELF1    | 0.3 |
| LACTB2   | 0.3 |
| YWHAH    | 0.3 |
| PCBP1    | 0.3 |
| BMS1     | 0.3 |
| RUNDC1   | 0.3 |
| METAP1   | 0.3 |
| SRRM1    | 0.3 |
| RPGRIP1L | 0.3 |
| NECAP1   | 0.3 |
| MTDH     | 0.3 |
| GALNT14  | 0.3 |
| SLC39A1  | 0.3 |
| DHX33    | 0.3 |
| MRPS33   | 0.3 |
| PIP5K1A  | 0.3 |
| MMACHC   | 0.3 |
| CNNM4    | 0.3 |
| MRPS22   | 0.3 |
| DHTKD1   | 0.3 |
| SMYD2    | 0.3 |
| LSM11    | 0.3 |
| SNHG10   | 0.3 |
| GOLIM4   | 0.3 |
| B4GALT3  | 0.3 |
| CLUAP1   | 0.3 |

HNSCC: Head and Neck Squamous Cell Carcinoma, PCC: Pearson correlation coefficient.

**Figures:**

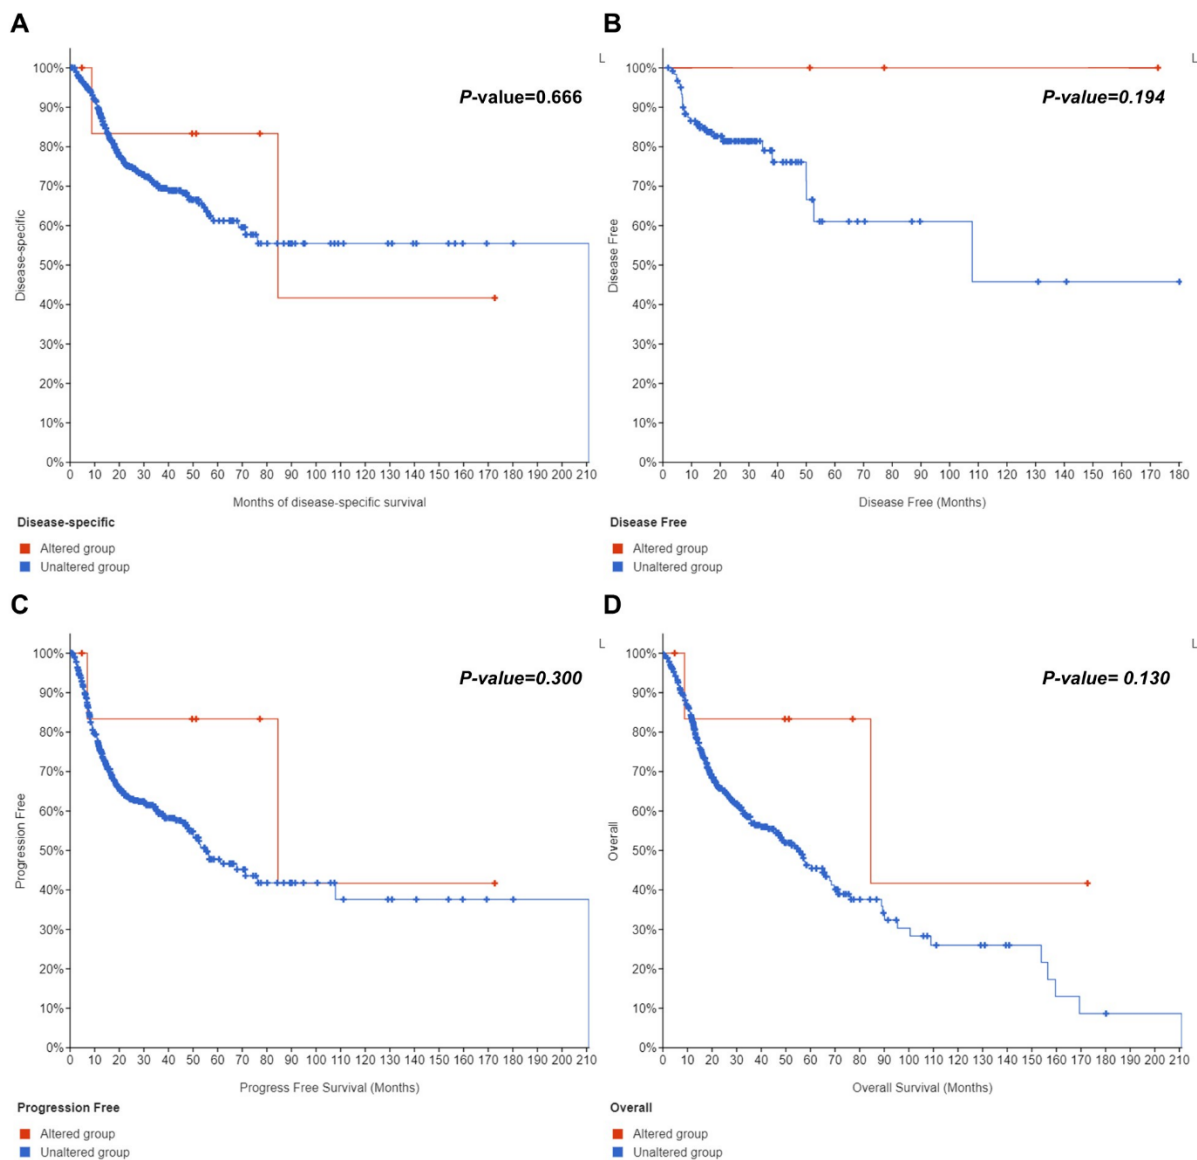

**Figure S1.** The prognostic significance of HPRT1 gene alterations in HNSCC using the data from the cBioPortal database. The association between the genetic alterations of the HPRT1 gene and DSS in patients with HNSCC (A). The relationship between the genetic alterations of the HPRT1 gene and DFS in HNSCC patients (B). The correlation between genetic alterations of the HPRT1 gene and PFS in HNSCC patients (C). The association between the genetic alterations of the HPRT1 gene and OS in patients with HNSCC (D). A log-rank  $P$ -value  $< 0.05$  was considered as statistically significant. HNSCC: Head and Neck Squamous Cell Carcinoma, DSS: Disease-Specific Survival, DFS: Disease Free Survival, PFS: Progression-Free Survival, OS: Overall Survival.

## References:

- [1] D. Toro-Domínguez, J. Martorell-Marugán, R. López-Domínguez, A. García-Moreno, V. González-Rumayor, M.E. Alarcón-Riquelme, P. Carmona-Sáez, ImaGEO: integrative gene expression meta-analysis from GEO database, *Bioinformatics* 35(5) (2018) 880-882.
- [2] M. Goldman, B. Craft, J. Zhu, D. Haussler, The UCSC Xena system for cancer genomics data visualization and interpretation, *AACR*, 2017.
- [3] P.J. Thul, C. Lindskog, The human protein atlas: A spatial map of the human proteome, *Protein Science* 27(1) (2018) 233-244.
- [4] S.A. Forbes, D. Beare, H. Boutselakis, S. Bamford, N. Bindal, J. Tate, C.G. Cole, S. Ward, E. Dawson, L. Ponting, R. Stefancsik, B. Harsha, C.Y. Kok, M. Jia, H. Jubb, Z. Sondka, S. Thompson, T. De, P.J. Campbell, COSMIC: somatic cancer genetics at high-resolution, *Nucleic Acids Research* 45(D1) (2016) D777-D783.
- [5] E. Cerami, J. Gao, U. Dogrusoz, B.E. Gross, S.O. Sumer, B.A. Aksoy, A. Jacobsen, C.J. Byrne, M.L. Heuer, E. Larsson, Y. Antipin, B. Reva, A.P. Goldberg, C. Sander, N. Schultz, The cBio cancer genomics portal: an open platform for exploring multidimensional cancer genomics data, *Cancer Discov* 2(5) (2012) 401-4.
- [6] B. Györffy, A. Lanczky, A.C. Eklund, C. Denkert, J. Budczies, Q. Li, Z. Szallasi, An online survival analysis tool to rapidly assess the effect of 22,277 genes on breast cancer prognosis using microarray data of 1,809 patients, *Breast cancer research and treatment* 123(3) (2010) 725-31.
- [7] B. Györffy, P. Surowiak, J. Budczies, A. Lanczky, Online survival analysis software to assess the prognostic value of biomarkers using transcriptomic data in non-small-cell lung cancer, *PloS one* 8(12) (2013) e82241.
- [8] M.V. Kuleshov, M.R. Jones, A.D. Rouillard, N.F. Fernandez, Q. Duan, Z. Wang, S. Koplev, S.L. Jenkins, K.M. Jagodnik, A. Lachmann, Enrichr: a comprehensive gene set enrichment analysis web server 2016 update, *Nucleic acids research* 44(W1) (2016) W90-W97.
